# Supplementary material for: Incidence of Hospitalization for Heart Failure and Case-Fatality Among 3.25 Million People With and Without Diabetes Mellitus
Source: PubMed Central journal article supplement (PMC6287897; doi:10.1161/circulationaha.118.034986), 2018-12-10
Supplement: cir-138-2774-s001.pdf [file cir-138-2774-s001.pdf]

# SUPPLEMENTAL MATERIAL

Incidence of hospitalisation for heart failure and case-fatality among 3.25 million people with and without diabetes

*David A McAllister MD, Stephanie Read PhD, Jan Kerssens PhD, Shona Livingstone MSc, Stuart McGurnaghan, Pardeep Jhund PhD, John Petrie PhD, Naveed Sattar PhD, Colin Fischbacher MD, Soren Lund Kristensen PhD, John McMurray PhD, Helen M Colhoun PhD\* and Sarah Wild PhD\**

## Contents

|                                                                                                                                                                                         |          |
|-----------------------------------------------------------------------------------------------------------------------------------------------------------------------------------------|----------|
| <b>Aggregated data</b>                                                                                                                                                                  | <b>2</b> |
| Table S1 Heart failure admissions by age, sex, deprivation and diagnosis . . . . .                                                                                                      | 2        |
| Table S2 Heart failure deaths within 30 days of admission by age, sex, deprivation and diagnosis . . . . .                                                                              | 3        |
| <b>Classification of drugs</b>                                                                                                                                                          | <b>5</b> |
| Table S3 Prescribed drugs, groups each BNF heading assigned to . . . . .                                                                                                                | 5        |
| <b>Incidence rate calculation using a look-back period</b>                                                                                                                              | <b>6</b> |
| Figure S1 Admissions and incident events in 3 example patients . . . . .                                                                                                                | 6        |
| Table S4 components of person time calculation . . . . .                                                                                                                                | 6        |
| Table S5 person time and rate calculation . . . . .                                                                                                                                     | 7        |
| <b>Missing data and imputation for risk factor data</b>                                                                                                                                 | <b>8</b> |
| Table S6 Proportion of missing data for each variable for the 2013 cohort of people with type 1 and type 2 diabetes, used to estimate associations with clinical risk factors . . . . . | 8        |
| <b>Main analysis - additional tables and figures</b>                                                                                                                                    | <b>9</b> |
| Figure S2 Prevalence of heart failure by diabetes type, age and sex . . . . .                                                                                                           | 9        |
| Figure S3 Prevalence of heart failure by diabetes type, deprivation and sex . . . . .                                                                                                   | 10       |
| Table S7 Cross-sectional prevalence model, coefficients and standard errors . . . . .                                                                                                   | 10       |
| Figure S4 Incidence rate of heart failure by diabetes type, deprivation and sex . . . . .                                                                                               | 11       |
| Table S8 Cross-sectional incidence rate model, coefficients and standard errors . . . . .                                                                                               | 11       |
| Figure S5 Modelled rate of heart failure by diabetes type, deprivation and sex. Rates shown on absolute scale . . . . .                                                                 | 12       |
| Table S9 Time trends incidence rate model, coefficients and standard errors . . . . .                                                                                                   | 12       |
| Table S10 Estimates of non-parametric smooth functions . . . . .                                                                                                                        | 13       |
| Table S11, Heart failure case-fatality model, coefficients and standard errors . . . . .                                                                                                | 13       |
| Table S12, Heart failure case-fatality over time model, coefficients and standard errors . . . . .                                                                                      | 14       |

|                                                                                                                                                 |           |
|-------------------------------------------------------------------------------------------------------------------------------------------------|-----------|
| <b>Additional analysis - IHD admissions excluded</b>                                                                                            | <b>14</b> |
| Table S13 Heart failure admissions and deaths by age, sex, deprivation and diagnosis with IHD admissions excluded . . . . .                     | 14        |
| Figure S6 Modelled rate of heart failure by diabetes type, age and sex with IHD admissions excluded                                             | 16        |
| Table S14 Cross-sectional model, coefficients and standard errors with IHD admissions excluded . . .                                            | 16        |
| Figure S7 Trends in rates of heart failure by diabetes type, sex and calendar year with IHD admissions excluded . . . . .                       | 17        |
| Table S15 Time trends model, coefficients and standard errors with IHD admissions excluded . . .                                                | 17        |
| Table S16 Estimates of non-parametric smooth functions with IHD admissions excluded . . . . .                                                   | 18        |
| <br>                                                                                                                                            |           |
| <b>Sensitivity analysis - Events coded in First position only</b>                                                                               | <b>19</b> |
| Figure S8 Modelled rate of heart failure by diabetes type, age and sex with diagnosis recored in first position only . . . . .                  | 19        |
| Table S17 Cross-sectional model, coefficients and standard errors with diagnosis recored in first position only . . . . .                       | 19        |
| Figure S9 Trends in rates of heart failure by diabetes type, sex and calendar year with with diagnosis recored in first position only . . . . . | 20        |
| Table S18 Time trends model, coefficients and standard errors with diagnosis recored in first position only . . . . .                           | 20        |
| Table S19 Estimates of non-parametric smooth functions with with diagnosis recored in first position only . . . . .                             | 21        |
| Legend for interactive figure . . . . .                                                                                                         | 21        |
| <br>                                                                                                                                            |           |
| <b>References</b>                                                                                                                               | <b>22</b> |

## Aggregated data

**Table S1 Heart failure admissions by age, sex, deprivation and diagnosis**

| Age      | Sex   | Deprivation | Diagnosis   | Admissions | Persontime |
|----------|-------|-------------|-------------|------------|------------|
| 20 to 49 | men   | 1-5         | No diabetes | 1087       | 5069751    |
| 20 to 49 | men   | 1-5         | Type1       | 40         | 41394      |
| 20 to 49 | men   | 1-5         | Type 2      | 86         | 49255      |
| 20 to 49 | men   | 6-10        | No diabetes | 2065       | 5263772    |
| 20 to 49 | men   | 6-10        | Type1       | 77         | 44487      |
| 20 to 49 | men   | 6-10        | Type 2      | 176        | 76730      |
| 20 to 49 | women | 1-5         | No diabetes | 433        | 5249525    |
| 20 to 49 | women | 1-5         | Type1       | 29         | 30875      |
| 20 to 49 | women | 1-5         | Type 2      | 31         | 31915      |
| 20 to 49 | women | 6-10        | No diabetes | 945        | 5601676    |
| 20 to 49 | women | 6-10        | Type1       | 46         | 32760      |
| 20 to 49 | women | 6-10        | Type 2      | 103        | 58611      |
| 50 to 59 | men   | 1-5         | No diabetes | 2055       | 1693189    |
| 50 to 59 | men   | 1-5         | Type1       | 46         | 12610      |
| 50 to 59 | men   | 1-5         | Type 2      | 385        | 99307      |

| Age      | Sex   | Deprivation | Diagnosis   | Admissions | Persontime |
|----------|-------|-------------|-------------|------------|------------|
| 50 to 59 | men   | 6-10        | No diabetes | 2955       | 1458296    |
| 50 to 59 | men   | 6-10        | Type1       | 98         | 11905      |
| 50 to 59 | men   | 6-10        | Type 2      | 708        | 123769     |
| 50 to 59 | women | 1-5         | No diabetes | 704        | 1794524    |
| 50 to 59 | women | 1-5         | Type1       | 39         | 8931       |
| 50 to 59 | women | 1-5         | Type 2      | 145        | 56955      |
| 50 to 59 | women | 6-10        | No diabetes | 1416       | 1569962    |
| 50 to 59 | women | 6-10        | Type1       | 69         | 8380       |
| 50 to 59 | women | 6-10        | Type 2      | 303        | 87522      |
| 60 to 69 | men   | 1-5         | No diabetes | 3812       | 1263936    |
| 60 to 69 | men   | 1-5         | Type1       | 75         | 7191       |
| 60 to 69 | men   | 1-5         | Type 2      | 1175       | 145099     |
| 60 to 69 | men   | 6-10        | No diabetes | 5353       | 1124748    |
| 60 to 69 | men   | 6-10        | Type1       | 97         | 6804       |
| 60 to 69 | men   | 6-10        | Type 2      | 1883       | 163745     |
| 60 to 69 | women | 1-5         | No diabetes | 1865       | 1411898    |
| 60 to 69 | women | 1-5         | Type1       | 49         | 6010       |
| 60 to 69 | women | 1-5         | Type 2      | 500        | 92678      |
| 60 to 69 | women | 6-10        | No diabetes | 3257       | 1287385    |
| 60 to 69 | women | 6-10        | Type1       | 79         | 5690       |
| 60 to 69 | women | 6-10        | Type 2      | 1134       | 132674     |
| 70 to 79 | men   | 1-5         | No diabetes | 5934       | 741182     |
| 70 to 79 | men   | 1-5         | Type1       | 87         | 3469       |
| 70 to 79 | men   | 1-5         | Type 2      | 2121       | 121589     |
| 70 to 79 | men   | 6-10        | No diabetes | 7511       | 704085     |
| 70 to 79 | men   | 6-10        | Type1       | 114        | 3372       |
| 70 to 79 | men   | 6-10        | Type 2      | 2743       | 135025     |
| 70 to 79 | women | 1-5         | No diabetes | 4479       | 943917     |
| 70 to 79 | women | 1-5         | Type1       | 82         | 3766       |
| 70 to 79 | women | 1-5         | Type 2      | 1383       | 103576     |
| 70 to 79 | women | 6-10        | No diabetes | 7232       | 987117     |
| 70 to 79 | women | 6-10        | Type1       | 102        | 3962       |
| 70 to 79 | women | 6-10        | Type 2      | 2445       | 142301     |
| 80 to 89 | men   | 1-5         | No diabetes | 7690       | 339174     |
| 80 to 89 | men   | 1-5         | Type1       | 35         | 899        |
| 80 to 89 | men   | 1-5         | Type 2      | 1737       | 49383      |
| 80 to 89 | men   | 6-10        | No diabetes | 7878       | 314140     |
| 80 to 89 | men   | 6-10        | Type1       | 38         | 833        |
| 80 to 89 | men   | 6-10        | Type 2      | 1717       | 46507      |
| 80 to 89 | women | 1-5         | No diabetes | 11513      | 640946     |
| 80 to 89 | women | 1-5         | Type1       | 48         | 1251       |
| 80 to 89 | women | 1-5         | Type 2      | 1843       | 64392      |
| 80 to 89 | women | 6-10        | No diabetes | 13245      | 653518     |
| 80 to 89 | women | 6-10        | Type1       | 63         | 1334       |
| 80 to 89 | women | 6-10        | Type 2      | 2341       | 74249      |

*Numbers less than or equal to 5 were suppressed to maintain confidentiality.*

**Table S2 Heart failure deaths within 30 days of admission by age, sex, deprivation and diagnosis**

| Age      | Sex   | Deprivation | Diagnosis | Admissions | Deaths |
|----------|-------|-------------|-----------|------------|--------|
| 20 to 29 | men   | 1-5         | pop       | 75         | <=5    |
| 20 to 29 | men   | 1-5         | t1dm      | <=5        | <=5    |
| 20 to 29 | men   | 1-5         | t2dm      | <=5        | <=5    |
| 20 to 29 | men   | 6-10        | pop       | 124        | <=5    |
| 20 to 29 | men   | 6-10        | t1dm      | 6          | <=5    |
| 20 to 29 | men   | 6-10        | t2dm      | <=5        | <=5    |
| 20 to 29 | women | 1-5         | pop       | 51         | <=5    |
| 20 to 29 | women | 1-5         | t1dm      | <=5        | <=5    |
| 20 to 29 | women | 6-10        | pop       | 79         | <=5    |
| 20 to 29 | women | 6-10        | t1dm      | <=5        | <=5    |
| 20 to 29 | women | 6-10        | t2dm      | <=5        | <=5    |
| 30 to 49 | men   | 1-5         | pop       | 1012       | 31     |
| 30 to 49 | men   | 1-5         | t1dm      | 36         | 6      |
| 30 to 49 | men   | 1-5         | t2dm      | 85         | <=5    |
| 30 to 49 | men   | 6-10        | pop       | 1941       | 100    |
| 30 to 49 | men   | 6-10        | t1dm      | 71         | <=5    |
| 30 to 49 | men   | 6-10        | t2dm      | 173        | <=5    |
| 30 to 49 | women | 1-5         | pop       | 382        | 26     |
| 30 to 49 | women | 1-5         | t1dm      | 27         | <=5    |
| 30 to 49 | women | 1-5         | t2dm      | 31         | <=5    |
| 30 to 49 | women | 6-10        | pop       | 866        | 71     |
| 30 to 49 | women | 6-10        | t1dm      | 41         | <=5    |
| 30 to 49 | women | 6-10        | t2dm      | 98         | 6      |
| 50 to 59 | men   | 1-5         | pop       | 2055       | 76     |
| 50 to 59 | men   | 1-5         | t1dm      | 46         | <=5    |
| 50 to 59 | men   | 1-5         | t2dm      | 385        | 23     |
| 50 to 59 | men   | 6-10        | pop       | 2955       | 181    |
| 50 to 59 | men   | 6-10        | t1dm      | 98         | 10     |
| 50 to 59 | men   | 6-10        | t2dm      | 708        | 46     |
| 50 to 59 | women | 1-5         | pop       | 704        | 30     |
| 50 to 59 | women | 1-5         | t1dm      | 39         | <=5    |
| 50 to 59 | women | 1-5         | t2dm      | 145        | 10     |
| 50 to 59 | women | 6-10        | pop       | 1416       | 126    |
| 50 to 59 | women | 6-10        | t1dm      | 69         | 7      |
| 50 to 59 | women | 6-10        | t2dm      | 303        | 28     |
| 60 to 69 | men   | 1-5         | pop       | 3812       | 264    |
| 60 to 69 | men   | 1-5         | t1dm      | 75         | 14     |
| 60 to 69 | men   | 1-5         | t2dm      | 1175       | 76     |
| 60 to 69 | men   | 6-10        | pop       | 5353       | 453    |
| 60 to 69 | men   | 6-10        | t1dm      | 97         | 15     |
| 60 to 69 | men   | 6-10        | t2dm      | 1883       | 160    |
| 60 to 69 | women | 1-5         | pop       | 1865       | 175    |
| 60 to 69 | women | 1-5         | t1dm      | 49         | <=5    |
| 60 to 69 | women | 1-5         | t2dm      | 500        | 39     |
| 60 to 69 | women | 6-10        | pop       | 3257       | 390    |
| 60 to 69 | women | 6-10        | t1dm      | 79         | 10     |
| 60 to 69 | women | 6-10        | t2dm      | 1134       | 119    |
| 70 to 79 | men   | 1-5         | pop       | 5934       | 684    |
| 70 to 79 | men   | 1-5         | t1dm      | 87         | 17     |
| 70 to 79 | men   | 1-5         | t2dm      | 2121       | 261    |
| 70 to 79 | men   | 6-10        | pop       | 7511       | 1001   |
| 70 to 79 | men   | 6-10        | t1dm      | 114        | 23     |

| Age      | Sex   | Deprivation | Diagnosis | Admissions | Deaths |
|----------|-------|-------------|-----------|------------|--------|
| 70 to 79 | men   | 6-10        | t2dm      | 2743       | 326    |
| 70 to 79 | women | 1-5         | pop       | 4479       | 578    |
| 70 to 79 | women | 1-5         | t1dm      | 82         | 17     |
| 70 to 79 | women | 1-5         | t2dm      | 1383       | 166    |
| 70 to 79 | women | 6-10        | pop       | 7232       | 997    |
| 70 to 79 | women | 6-10        | t1dm      | 102        | 13     |
| 70 to 79 | women | 6-10        | t2dm      | 2445       | 321    |
| 80 to 89 | men   | 1-5         | pop       | 7690       | 1531   |
| 80 to 89 | men   | 1-5         | t1dm      | 35         | 10     |
| 80 to 89 | men   | 1-5         | t2dm      | 1737       | 307    |
| 80 to 89 | men   | 6-10        | pop       | 7878       | 1579   |
| 80 to 89 | men   | 6-10        | t1dm      | 38         | 13     |
| 80 to 89 | men   | 6-10        | t2dm      | 1717       | 322    |
| 80 to 89 | women | 1-5         | pop       | 11513      | 2260   |
| 80 to 89 | women | 1-5         | t1dm      | 48         | 10     |
| 80 to 89 | women | 1-5         | t2dm      | 1843       | 350    |
| 80 to 89 | women | 6-10        | pop       | 13245      | 2627   |
| 80 to 89 | women | 6-10        | t1dm      | 63         | 14     |
| 80 to 89 | women | 6-10        | t2dm      | 2341       | 440    |

## Classification of drugs

All drugs for people with diabetes are included in the Scottish diabetes register, having been extracted from primary care records. These are assigned to a British National Formulary (BNF) chapter, section and paragraph heading. We collapsed the BNF headings to each of the groups shown in Table S3. See <https://openprescribing.net/bnf/> for a complete list of headings. Patients were counted as having been prescribed the drug if they were currently prescribed a drug within that class on the cohort start date, the 1st of October 2013.

**Table S3 Prescribed drugs, groups each BNF heading assigned to**

| BNF heading | BNF heading label                       | Group                           |
|-------------|-----------------------------------------|---------------------------------|
| 2.2.1       | Thiazides And Related Diuretics         | Thiazides                       |
| 2.2.2       | Loop Diuretics                          | Loop                            |
| 2.2.3       | Pot-Sparing Diuretics&Aldosterone Antag | Potassium sparing               |
| 2.2.4       | Potassium Sparing Diuretics & Compounds | Potassium sparing               |
| 2.4         | Beta-Adrenoceptor Blocking Drugs        | Beta blockers                   |
| 2.5.5       | Renin-Angiotensin System Drugs          | Renin-Angiotensin System Drugs  |
| 2.6.1       | Nitrates                                | Nitrates and other anti-anginal |
| 2.6.2       | Calcium-Channel Blockers                | Calcium-Channel Blockers        |
| 2.6.3       | Other Antianginal Drugs                 | Nitrates and other anti-anginal |
| 2.8.2       | Oral Anticoagulants                     | Anticoagulants                  |
| 2.9         | Antiplatelet Drugs                      | Antiplatelets                   |
| 2.12        | Lipid-Regulating Drugs                  | Lipid lowering drugs            |

## Incidence rate calculation using a look-back period

Figure S1 shows a worked example for the calculation of events and person-time for a notional population stratum. For example, men born in 1968 who did not have diabetes. In this example, 3 people had one or more admission with heart failure during the follow-up period, and/or during the 10 year look-back period. The calculation of year-specific incident counts is straightforward, and is shown alongside the figure. Any event after the start of the cohort period, where there was no previous event within 10 years is considered incident and this is summed across rows.

The person-years calculation is more complex and is shown in Tables S4 and S5.

**Figure S1 Admissions and incident events in 3 example patients**

|      | One |   | Two |   | Three |   | Total |
|------|-----|---|-----|---|-------|---|-------|
|      | A   | I | A   | I | A     | I | I     |
| 1994 |     |   |     |   |       |   |       |
| 1995 | 1   | 0 |     |   |       |   |       |
| 1996 |     |   |     |   |       |   |       |
| 1997 |     |   |     |   |       |   |       |
| 1998 |     |   |     |   |       |   |       |
| 1999 |     |   |     |   |       |   |       |
| 2000 |     |   |     |   |       |   |       |
| 2001 |     |   |     |   |       |   |       |
| 2002 |     |   |     |   |       |   |       |
| 2003 |     |   |     |   | 1     | 0 |       |
| 2004 |     |   |     |   |       |   | 0     |
| 2005 |     |   |     |   |       |   | 0     |
| 2006 |     |   |     |   |       |   | 0     |
| 2007 |     |   |     |   |       |   | 0     |
| 2008 |     |   |     |   |       |   | 0     |
| 2009 |     |   |     |   |       |   | 0     |
| 2010 |     |   |     |   |       |   | 0     |
| 2011 | 1   | 1 | 1   | 1 |       |   | 2     |
| 2012 |     |   |     |   |       |   | 0     |
| 2013 |     |   |     |   |       |   | 0     |

A - admission, I incident event.

**Table S4 components of person time calculation**

| Year | POP | DM | p1 | p2 | p3 |
|------|-----|----|----|----|----|
| 2004 | 190 | 10 | 0  | 1  | 0  |
| 2005 | 190 | 10 | 0  | 1  | 0  |
| 2006 | 190 | 10 | 1  | 1  | 0  |
| 2007 | 190 | 10 | 1  | 1  | 0  |
| 2008 | 190 | 10 | 1  | 1  | 0  |
| 2009 | 190 | 12 | 1  | 1  | 0  |
| 2010 | 190 | 12 | 1  | 1  | 0  |
| 2011 | 185 | 12 | 0  | 0  | 0  |
| 2012 | 185 | 12 | 0  | 0  | 0  |
| 2013 | 185 | 13 | 0  | 0  | 1  |

POP refers to the mid-year estimate for the population (based on National Records Scotland census data and mid-year estimation modelling ). DM refers to the population with diabetes (from the diabetes register) and p1, p2 and p3 refers to the person-time for the 3 patients.

Since patient 1 had an admission in 1995, they were not eligible to have another incident event within ten years, and so the person-time for each of these periods is removed. Patient 2 had an incident event in 2011 and so only contributed 7 person-years. Patient 3 had an event in 2003 which was not incident, and as a consequence contributed only one person year.

The person-time for each year, within each stratum, is calculated as follows:-

$$PT = POP - DM - N + p_1 + p_2 + p_3 + \dots p_n$$

Where *POP*, *DM* and  $p_n$  are as per Table S4 and N indicates the number of patients with events observed.

In R, for this example, this would be calculated as follows, along with the calendar-year/stratum-specific rate.

```
pt_ill2 <- pt_ill %>%
  mutate(`Person time` = POP - DM - 3 + p1 + p2 + p3,
         `Rate per 1000 person-years` = 1000 * Incident / `Person time`)
```

**Table S5 person time and rate calculation**

| Year | POP | DM | p1 | p2 | p3 | Incident | Person time | Rate per 1000 person-years |
|------|-----|----|----|----|----|----------|-------------|----------------------------|
| 2004 | 190 | 10 | 0  | 1  | 0  | 0        | 178         | 0.0                        |
| 2005 | 190 | 10 | 0  | 1  | 0  | 0        | 178         | 0.0                        |
| 2006 | 190 | 10 | 1  | 1  | 0  | 0        | 179         | 0.0                        |
| 2007 | 190 | 10 | 1  | 1  | 0  | 0        | 179         | 0.0                        |
| 2008 | 190 | 10 | 1  | 1  | 0  | 0        | 179         | 0.0                        |
| 2009 | 190 | 12 | 1  | 1  | 0  | 0        | 177         | 0.0                        |
| 2010 | 190 | 12 | 1  | 1  | 0  | 0        | 177         | 0.0                        |
| 2011 | 185 | 12 | 0  | 0  | 0  | 2        | 170         | 11.8                       |
| 2012 | 185 | 12 | 0  | 0  | 0  | 0        | 170         | 0.0                        |
| 2013 | 185 | 13 | 0  | 0  | 1  | 0        | 170         | 0.0                        |

## Missing data and imputation for risk factor data

For the cohort with diabetes identified in 2013, there was missing data for a number of variables (Table S6).

**Table S6 Proportion of missing data for each variable for the 2013 cohort of people with type 1 and type 2 diabetes, used to estimate associations with clinical risk factors**

|                       | Type 2 | Type 1 |
|-----------------------|--------|--------|
| Age                   | 0%     | 0%     |
| BMI                   | 20.1%  | 16.4%  |
| Deprivation (Deciles) | 0%     | 0%     |
| Diastolic BP          | 7.5%   | 9.1%   |
| EGFR                  | 39.8%  | 42.5%  |
| HbA1                  | 17.6%  | 11.2%  |
| HDL                   | 18.8%  | 19.2%  |
| LDL                   | 71.1%  | 57.9%  |
| Retinopathy           | 0%     | 0%     |
| Sex                   | 0%     | 0%     |
| Smoking status        | 9.2%   | 8.9%   |
| Systolic BP           | 7.5%   | 9.1%   |
| Total cholesterol     | 11.1%  | 13%    |

Summary statistics for each variable are reported (in Table 3 in the main manuscript) based on the available data for each variable. For the logistic regression models, we carried out multiple imputation, using the MICE package in R.<sup>1</sup>

We obtained 5 imputed datasets, using all the variables included in the planned model as well as LDL cholesterol and diastolic blood pressure. Imputation was performed using the following methods for each variable-type:- predictive mean matching for continuous variables, logistic regression for binary variables, polytomous regression for unordered categorical variables and proportional odds model for ordered categorical variables.

We then fit a logistic regression model to each imputed dataset and pooled the results using the method described by Barnard and Rubin.<sup>2</sup> Results of the modelling are shown in Table 3 of the main manuscript.



# Main analysis - additional tables and figures

Figure S2 Prevalence of heart failure by diabetes type, age and sex

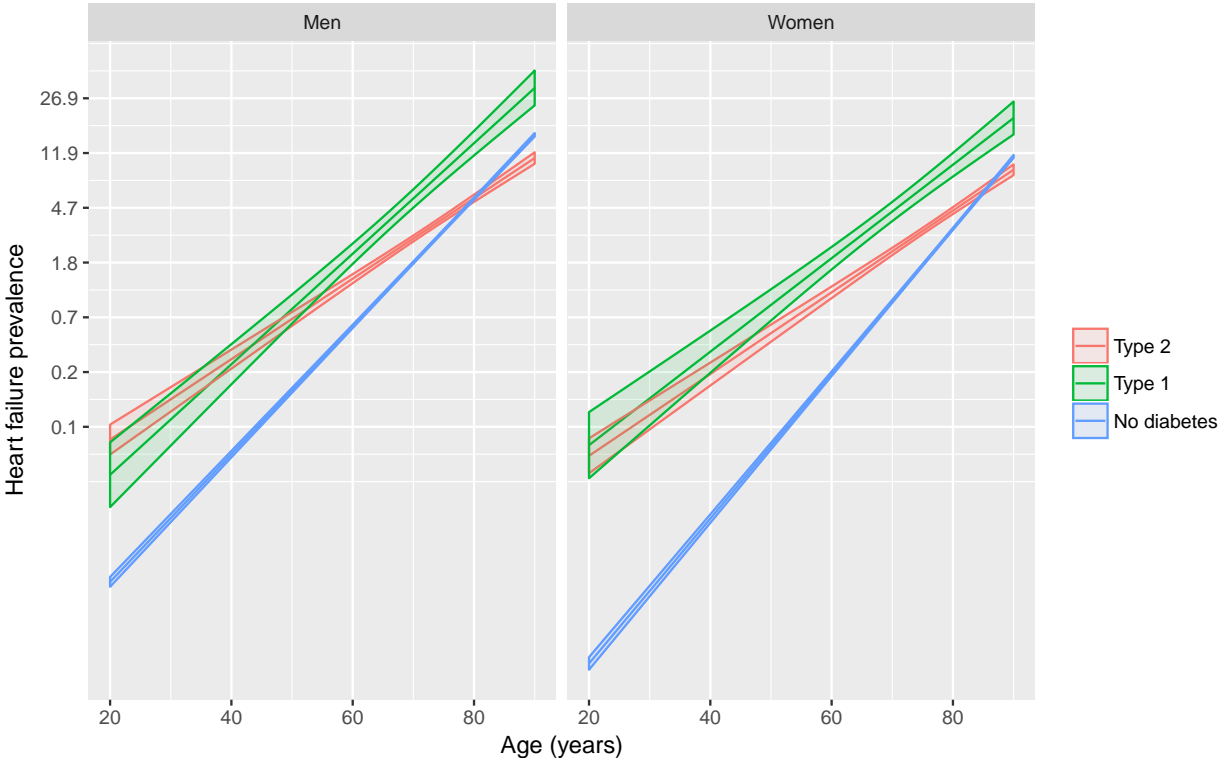

The lines represent the predicted prevalences obtained from logistic regression models of prevalent heart failure events on age, sex, deprivation and diabetes type, with interaction terms included where these improved model fit. Predictions were made at the median deprivation score.

**Figure S3 Prevalence of heart failure by diabetes type, deprivation and sex**

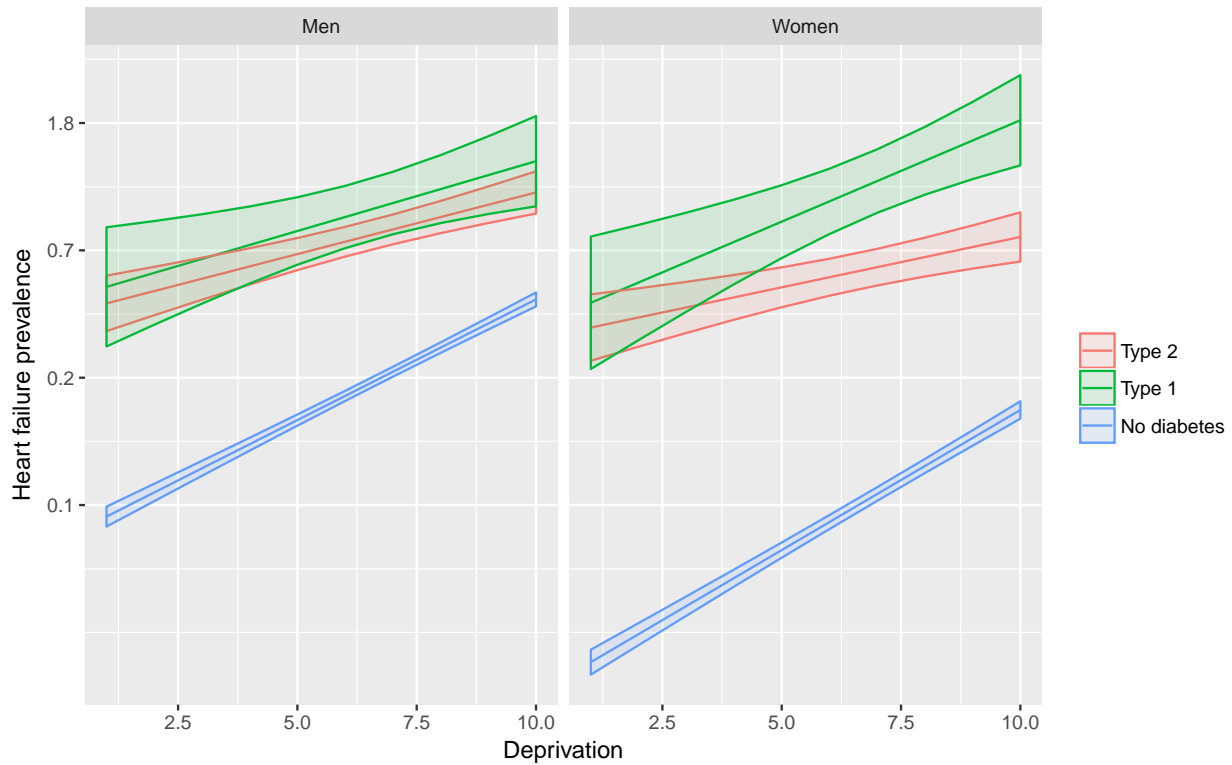

The lines represent the predicted prevalences obtained from logistic regression models of prevalent heart failure events on age, sex, deprivation and diabetes type, with interaction terms included where these improved model fit. Predictions were made at age 50.

**Table S7 Cross-sectional prevalence model, coefficients and standard errors**

|                          | Estimate | Std. Error | t value  | Pr(> t ) |
|--------------------------|----------|------------|----------|----------|
| (Intercept)              | -7.28    | 0.045      | -161.023 | <0.001   |
| age_ten                  | 1.371    | 0.016      | 87.729   | <0.001   |
| sex                      | -1.173   | 0.048      | -24.383  | <0.001   |
| dep_two                  | 0.948    | 0.03       | 31.527   | <0.001   |
| typet1dm                 | 1.884    | 0.275      | 6.846    | <0.001   |
| typet2dm                 | 1.767    | 0.134      | 13.194   | <0.001   |
| age_ten:sex              | 0.156    | 0.012      | 13.405   | <0.001   |
| age_ten:dep_two          | -0.205   | 0.01       | -19.533  | <0.001   |
| sex:dep_two              | 0.153    | 0.024      | 6.32     | <0.001   |
| age_ten:typet1dm         | -0.196   | 0.109      | -1.788   | 0.074    |
| age_ten:typet2dm         | -0.57    | 0.051      | -11.209  | <0.001   |
| sex:typet1dm             | 0.999    | 0.327      | 3.058    | 0.002    |
| sex:typet2dm             | 1.001    | 0.142      | 7.052    | <0.001   |
| dep_two:typet1dm         | -0.399   | 0.189      | -2.11    | 0.035    |
| dep_two:typet2dm         | -0.464   | 0.091      | -5.093   | <0.001   |
| age_ten:sex:typet1dm     | -0.312   | 0.081      | -3.835   | <0.001   |
| age_ten:sex:typet2dm     | -0.145   | 0.039      | -3.747   | <0.001   |
| age_ten:dep_two:typet1dm | 0.039    | 0.074      | 0.523    | 0.601    |

|                          | Estimate | Std. Error | t value | Pr(> t ) |
|--------------------------|----------|------------|---------|----------|
| age_ten:dep_two:typet2dm | 0.138    | 0.035      | 3.949   | <0.001   |
| sex:dep_two:typet1dm     | 0.096    | 0.205      | 0.467   | 0.641    |
| sex:dep_two:typet2dm     | -0.241   | 0.073      | -3.325  | 0.001    |

Logistic regression model with admission as the outcome. Age\_ten is the age in years divided by ten and dep\_two is the deprivation score divided by two.

Figure S4 Incidence rate of heart failure by diabetes type, deprivation and sex

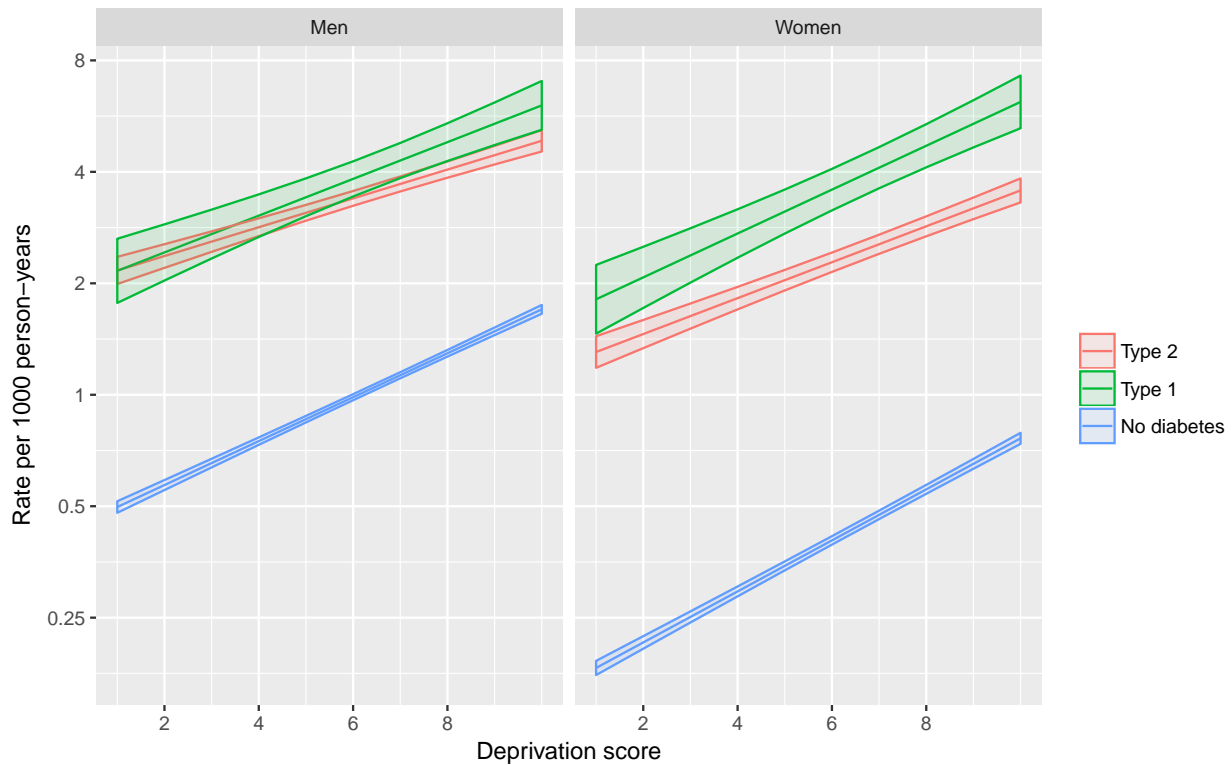

The lines represent the predicted rates obtained from quasi-Poisson regression models of incident heart failure events on age, sex, deprivation and diabetes type, with interaction terms included where these improved model fit. Predictions were made for men and women aged 50.

Table S8 Cross-sectional incidence rate model, coefficients and standard errors

|                 | Estimate | Std. Error | t value  | Pr(> t ) |
|-----------------|----------|------------|----------|----------|
| (Intercept)     | -7.742   | 0.021      | -372.393 | <0.001   |
| age_ten         | 1.131    | 0.007      | 154.279  | <0.001   |
| sex             | -1.023   | 0.023      | -45.447  | <0.001   |
| dep_two         | 0.683    | 0.014      | 47.613   | <0.001   |
| typet1dm        | 1.491    | 0.117      | 12.765   | <0.001   |
| typet2dm        | 1.518    | 0.053      | 28.734   | <0.001   |
| age_ten:sex     | 0.162    | 0.006      | 28.1     | <0.001   |
| age_ten:dep_two | -0.167   | 0.005      | -32.915  | <0.001   |

|                          | Estimate | Std. Error | t value | Pr(> t ) |
|--------------------------|----------|------------|---------|----------|
| sex:dep_two              | 0.11     | 0.012      | 9.364   | <0.001   |
| age_ten:typet1dm         | -0.177   | 0.054      | -3.294  | 0.001    |
| age_ten:typet2dm         | -0.289   | 0.02       | -14.751 | <0.001   |
| sex:typet1dm             | 0.824    | 0.087      | 9.479   | <0.001   |
| sex:typet2dm             | 0.494    | 0.042      | 11.852  | <0.001   |
| dep_two:typet1dm         | -0.111   | 0.079      | -1.413  | 0.158    |
| dep_two:typet2dm         | -0.235   | 0.037      | -6.433  | <0.001   |
| age_ten:sex:typet1dm     | -0.204   | 0.041      | -5.013  | <0.001   |
| age_ten:sex:typet2dm     | -0.114   | 0.015      | -7.363  | <0.001   |
| age_ten:dep_two:typet1dm | 0.047    | 0.036      | 1.301   | 0.193    |
| age_ten:dep_two:typet2dm | 0.053    | 0.014      | 3.919   | <0.001   |

Quasi-Poisson regression model with admissions or death as the outcome. Age\_ten is the age in years divided by ten and dep\_two is the deprivation score divided by two. The standard errors and P-values are scaled to allow for overdispersion.

**Figure S5 Modelled rate of heart failure by diabetes type, deprivation and sex. Rates shown on absolute scale**

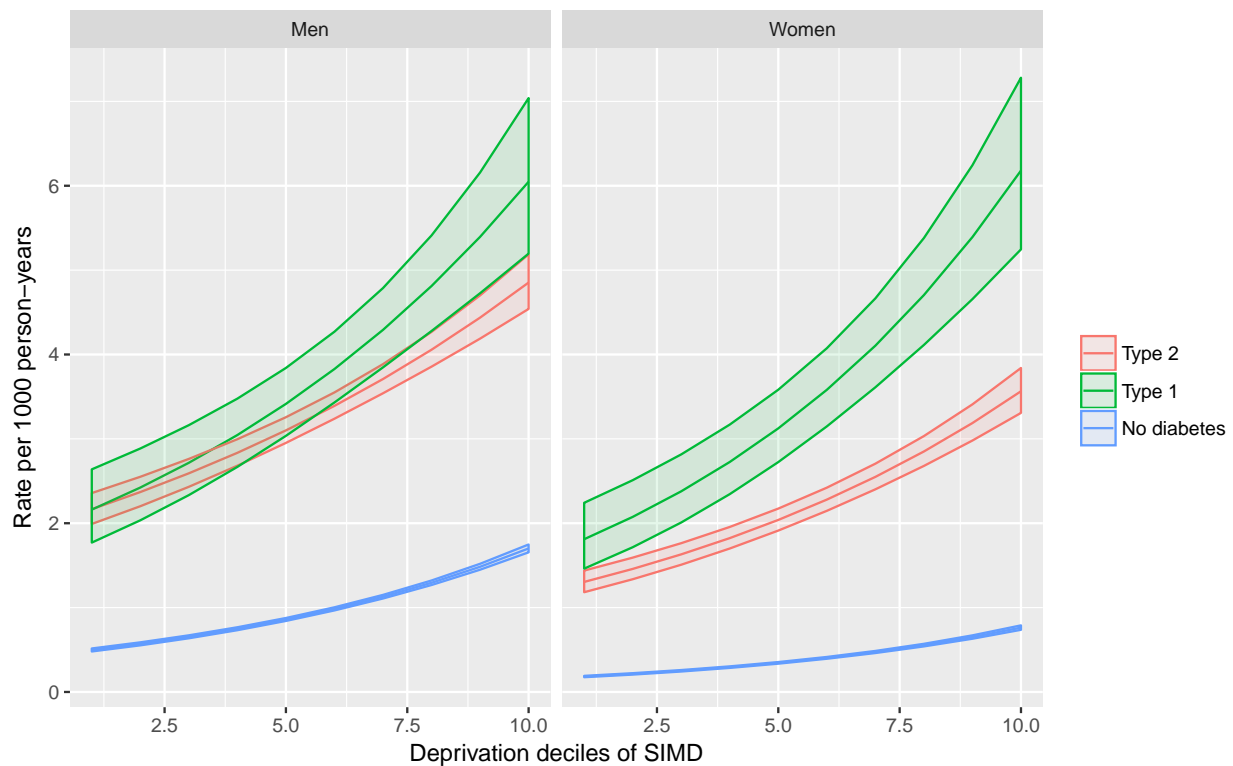

This figure is similar to Figure one in the main manuscript, using the same regression model, but with deprivation rather than age being shown on the x-axis. The lines represent the predicted rates obtained from quasi-Poisson regression models of incident heart failure events on age, sex, deprivation and diabetes type, with interaction terms included where these improved model fit. Predictions were made at age 50.

**Table S9 Time trends incidence rate model, coefficients and standard errors**

|                          | Estimate | Std. Error | t value  | Pr(> t ) |
|--------------------------|----------|------------|----------|----------|
| (Intercept)              | -7.738   | 0.021      | -373.826 | <0.001   |
| age_ten                  | 1.135    | 0.007      | 155.51   | <0.001   |
| sex                      | -1.024   | 0.022      | -45.789  | <0.001   |
| dep_two                  | 0.682    | 0.014      | 47.877   | <0.001   |
| year                     | -0.009   | 0.003      | -3.774   | <0.001   |
| typet1dm                 | 1.511    | 0.116      | 13.031   | <0.001   |
| typet2dm                 | 1.521    | 0.053      | 28.946   | <0.001   |
| age_ten:sex              | 0.161    | 0.006      | 28.112   | <0.001   |
| age_ten:dep_two          | -0.168   | 0.005      | -33.366  | <0.001   |
| sex:dep_two              | 0.111    | 0.012      | 9.485    | <0.001   |
| age_ten:year             | -0.005   | 0.001      | -5.481   | <0.001   |
| age_ten:typet1dm         | -0.181   | 0.053      | -3.399   | 0.001    |
| age_ten:typet2dm         | -0.287   | 0.02       | -14.714  | <0.001   |
| sex:typet1dm             | 0.823    | 0.086      | 9.549    | <0.001   |
| sex:typet2dm             | 0.493    | 0.041      | 11.896   | <0.001   |
| dep_two:typet1dm         | -0.116   | 0.078      | -1.489   | 0.137    |
| dep_two:typet2dm         | -0.234   | 0.036      | -6.453   | <0.001   |
| year:typet1dm            | -0.022   | 0.01       | -2.125   | 0.034    |
| year:typet2dm            | -0.004   | 0.003      | -1.481   | 0.139    |
| age_ten:sex:typet1dm     | -0.206   | 0.04       | -5.102   | <0.001   |
| age_ten:sex:typet2dm     | -0.113   | 0.015      | -7.399   | <0.001   |
| age_ten:dep_two:typet1dm | 0.047    | 0.036      | 1.306    | 0.192    |
| age_ten:dep_two:typet2dm | 0.054    | 0.014      | 4.002    | <0.001   |

*Quasi-Poisson regression model with admissions or death as the outcome. Age\_ten is the age in years divided by ten and dep\_two is the deprivation score divided by two. The standard errors and P-values are scaled to allow for overdispersion.*

**Table S10 Estimates of non-parametric smooth functions**

|             | Estimated degrees of freedom | Chi-squared | Approximate P-value |
|-------------|------------------------------|-------------|---------------------|
| No diabetes | 7.825                        | 453.517     | <0.001              |
| Type 1      | 1.916                        | 17.512      | <0.001              |
| Type 2      | 2.15                         | 117.707     | <0.001              |

*Significance tests for the non-parametric smooth terms from a generalized additive model of incident heart failure events on age, sex, deprivation, diabetes type and calendar year, with interaction terms included where these improved model fit, using a log-link and Poisson likelihood, with correction of the standard errors for overdispersion. Penalized thin plate regression splines were used to model non-linear associations for calendar year by diagnosis type. Predictions were made for men and women aged 50.*

**Table S11, Heart failure case-fatality model, coefficients and standard errors**

|              | Estimate | Std. Error | z value | Pr(> z ) |
|--------------|----------|------------|---------|----------|
| (Intercept)  | -2.938   | 0.037      | -79.507 | <0.001   |
| age_ten      | 0.239    | 0.024      | 10.07   | <0.001   |
| I(age_ten^2) | 0.041    | 0.005      | 7.985   | <0.001   |

|              | Estimate | Std. Error | z value | Pr(> z ) |
|--------------|----------|------------|---------|----------|
| sex          | 0.041    | 0.02       | 2.077   | 0.038    |
| dep_two      | 0.113    | 0.016      | 7.317   | <0.001   |
| typet1dm     | 0.649    | 0.104      | 6.248   | <0.001   |
| typet2dm     | -0.046   | 0.031      | -1.483  | 0.138    |
| sex:typet1dm | -0.375   | 0.158      | -2.377  | 0.017    |
| sex:typet2dm | 0.021    | 0.044      | 0.485   | 0.628    |

*Logistic regression model with death as the outcome and admission or death as the denominator. Age\_ten is the age in years divided by ten and dep\_two is the deprivation score divided by two.*

**Table S12, Heart failure case-fatality over time model, coefficients and standard errors**

|               | Estimate | Std. Error | z value | Pr(> z ) |
|---------------|----------|------------|---------|----------|
| (Intercept)   | -2.917   | 0.037      | -79.47  | <0.001   |
| age_ten       | 0.23     | 0.024      | 9.696   | <0.001   |
| I(age_ten^2)  | 0.044    | 0.005      | 8.521   | <0.001   |
| sex           | 0.036    | 0.018      | 2.064   | 0.039    |
| dep_two       | 0.108    | 0.016      | 6.988   | <0.001   |
| year          | -0.033   | 0.003      | -10.135 | <0.001   |
| typet1dm      | 0.47     | 0.079      | 5.976   | <0.001   |
| typet2dm      | -0.017   | 0.023      | -0.768  | 0.442    |
| year:typet1dm | 0.01     | 0.027      | 0.38    | 0.704    |
| year:typet2dm | -0.006   | 0.008      | -0.817  | 0.414    |

*Logistic regression model with death as the outcome and admission or death as the denominator. Age\_ten is the age in years divided by ten and dep\_two is the deprivation score divided by two.*

## Additional analysis - IHD admissions excluded

**Table S13 Heart failure admissions and deaths by age, sex, deprivation and diagnosis with IHD admissions excluded**

| Age      | Sex   | Deprivation | Diagnosis   | Admissions | Persontime |
|----------|-------|-------------|-------------|------------|------------|
| 20 to 49 | men   | 1-5         | No diabetes | 901        | 5069826    |
| 20 to 49 | men   | 1-5         | Type1       | 29         | 41407      |
| 20 to 49 | men   | 1-5         | Type 2      | 78         | 49272      |
| 20 to 49 | men   | 6-10        | No diabetes | 1692       | 5263834    |
| 20 to 49 | men   | 6-10        | Type1       | 50         | 44543      |
| 20 to 49 | men   | 6-10        | Type 2      | 138        | 76831      |
| 20 to 49 | women | 1-5         | No diabetes | 397        | 5249540    |
| 20 to 49 | women | 1-5         | Type1       | diff       | 30878      |
| 20 to 49 | women | 1-5         | Type 2      | diff       | 31920      |
| 20 to 49 | women | 6-10        | No diabetes | 822        | 5601684    |
| 20 to 49 | women | 6-10        | Type1       | 35         | 32785      |
| 20 to 49 | women | 6-10        | Type 2      | 77         | 58653      |

| Age      | Sex   | Deprivation | Diagnosis   | Admissions | Persontime |
|----------|-------|-------------|-------------|------------|------------|
| 50 to 59 | men   | 1-5         | No diabetes | 1587       | 1693233    |
| 50 to 59 | men   | 1-5         | Type1       | 28         | 12659      |
| 50 to 59 | men   | 1-5         | Type 2      | 310        | 99493      |
| 50 to 59 | men   | 6-10        | No diabetes | 2141       | 1458332    |
| 50 to 59 | men   | 6-10        | Type1       | 56         | 11988      |
| 50 to 59 | men   | 6-10        | Type 2      | 546        | 124173     |
| 50 to 59 | women | 1-5         | No diabetes | 588        | 1794491    |
| 50 to 59 | women | 1-5         | Type1       | 24         | 8981       |
| 50 to 59 | women | 1-5         | Type 2      | 117        | 57015      |
| 50 to 59 | women | 6-10        | No diabetes | 1123       | 1569973    |
| 50 to 59 | women | 6-10        | Type1       | 47         | 8417       |
| 50 to 59 | women | 6-10        | Type 2      | 246        | 87663      |
| 60 to 69 | men   | 1-5         | No diabetes | 2834       | 1263927    |
| 60 to 69 | men   | 1-5         | Type1       | 50         | 7243       |
| 60 to 69 | men   | 1-5         | Type 2      | 871        | 145751     |
| 60 to 69 | men   | 6-10        | No diabetes | 3678       | 1124789    |
| 60 to 69 | men   | 6-10        | Type1       | 63         | 6891       |
| 60 to 69 | men   | 6-10        | Type 2      | 1424       | 164762     |
| 60 to 69 | women | 1-5         | No diabetes | 1489       | 1411856    |
| 60 to 69 | women | 1-5         | Type1       | 30         | 6061       |
| 60 to 69 | women | 1-5         | Type 2      | 364        | 92946      |
| 60 to 69 | women | 6-10        | No diabetes | 2409       | 1287403    |
| 60 to 69 | women | 6-10        | Type1       | 52         | 5749       |
| 60 to 69 | women | 6-10        | Type 2      | 862        | 133206     |
| 70 to 79 | men   | 1-5         | No diabetes | 3982       | 741231     |
| 70 to 79 | men   | 1-5         | Type1       | 45         | 3528       |
| 70 to 79 | men   | 1-5         | Type 2      | 1559       | 122825     |
| 70 to 79 | men   | 6-10        | No diabetes | 4860       | 704115     |
| 70 to 79 | men   | 6-10        | Type1       | 72         | 3448       |
| 70 to 79 | men   | 6-10        | Type 2      | 1962       | 136811     |
| 70 to 79 | women | 1-5         | No diabetes | 3334       | 943974     |
| 70 to 79 | women | 1-5         | Type1       | 49         | 3833       |
| 70 to 79 | women | 1-5         | Type 2      | 1042       | 104267     |
| 70 to 79 | women | 6-10        | No diabetes | 5120       | 987247     |
| 70 to 79 | women | 6-10        | Type1       | 67         | 4025       |
| 70 to 79 | women | 6-10        | Type 2      | 1833       | 143606     |
| 80 to 89 | men   | 1-5         | No diabetes | 5219       | 340043     |
| 80 to 89 | men   | 1-5         | Type1       | 19         | 929        |
| 80 to 89 | men   | 1-5         | Type 2      | 1284       | 50231      |
| 80 to 89 | men   | 6-10        | No diabetes | 5336       | 314982     |
| 80 to 89 | men   | 6-10        | Type1       | 26         | 856        |
| 80 to 89 | men   | 6-10        | Type 2      | 1284       | 47422      |
| 80 to 89 | women | 1-5         | No diabetes | 8582       | 642195     |
| 80 to 89 | women | 1-5         | Type1       | 28         | 1271       |
| 80 to 89 | women | 1-5         | Type 2      | 1412       | 65181      |
| 80 to 89 | women | 6-10        | No diabetes | 9563       | 654989     |
| 80 to 89 | women | 6-10        | Type1       | 46         | 1353       |
| 80 to 89 | women | 6-10        | Type 2      | 1739       | 75363      |

*Numbers less than or equal to 5, or where the difference from Table S1 is less than or equal to 5 were suppressed to maintain confidentiality.*

**Figure S6 Modelled rate of heart failure by diabetes type, age and sex with IHD admissions excluded**

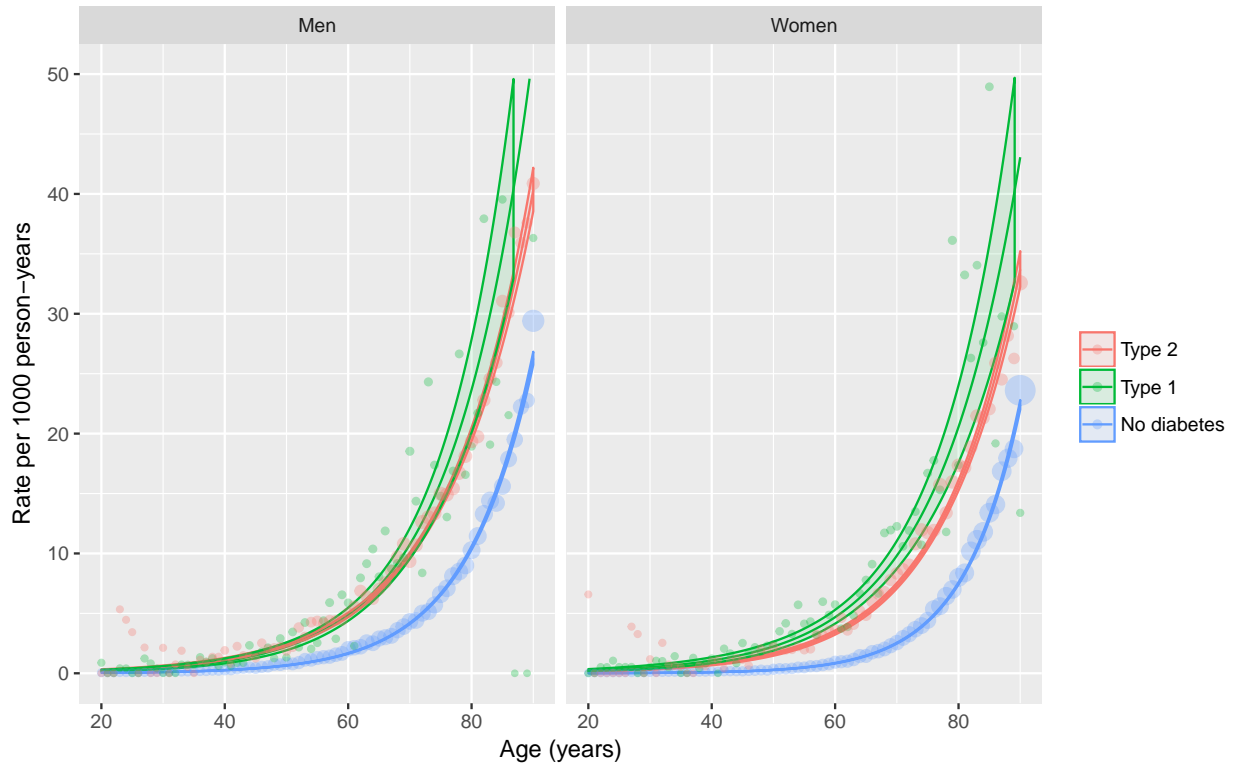

The lines represent the predicted rates obtained from quasi-Poisson regression models of incident heart failure events on age, sex, deprivation and diabetes type, with interaction terms included where these improved model fit. Predictions were made at the median deprivation score. Points represent event rates stratified by age (in years), sex and diabetes type.

**Table S14 Cross-sectional model, coefficients and standard errors with IHD admissions excluded**

|                  | Estimate | Std. Error | t value  | Pr(> t ) |
|------------------|----------|------------|----------|----------|
| (Intercept)      | -7.945   | 0.024      | -326.852 | <0.001   |
| age_ten          | 1.079    | 0.009      | 124.583  | <0.001   |
| sex              | -0.956   | 0.027      | -36.019  | <0.001   |
| dep_two          | 0.621    | 0.017      | 36.802   | <0.001   |
| typet1dm         | 1.329    | 0.144      | 9.237    | <0.001   |
| typet2dm         | 1.481    | 0.062      | 23.86    | <0.001   |
| age_ten:sex      | 0.173    | 0.007      | 25.265   | <0.001   |
| age_ten:dep_two  | -0.158   | 0.006      | -26.279  | <0.001   |
| sex:dep_two      | 0.105    | 0.014      | 7.368    | <0.001   |
| age_ten:typet1dm | -0.222   | 0.068      | -3.254   | 0.001    |
| age_ten:typet2dm | -0.261   | 0.023      | -11.256  | <0.001   |
| sex:typet1dm     | 0.855    | 0.108      | 7.927    | <0.001   |
| sex:typet2dm     | 0.43     | 0.049      | 8.763    | <0.001   |
| dep_two:typet1dm | -0.113   | 0.098      | -1.161   | 0.246    |
| dep_two:typet2dm | -0.187   | 0.043      | -4.361   | <0.001   |



|                          | Estimate | Std. Error | t value | Pr(> t ) |
|--------------------------|----------|------------|---------|----------|
| age_ten:sex:typet1dm     | -0.221   | 0.052      | -4.29   | <0.001   |
| age_ten:sex:typet2dm     | -0.112   | 0.018      | -6.158  | <0.001   |
| age_ten:dep_two:typet1dm | 0.089    | 0.046      | 1.928   | 0.054    |
| age_ten:dep_two:typet2dm | 0.044    | 0.016      | 2.753   | 0.006    |

Quasi-Poisson regression model with admissions or death as the outcome. Age\_ten is the age in years divided by ten and dep\_two is the deprivation score divided by two. The standard errors and P-values are scaled to allow for overdispersion.

**Figure S7 Trends in rates of heart failure by diabetes type, sex and calendar year with IHD admissions excluded**

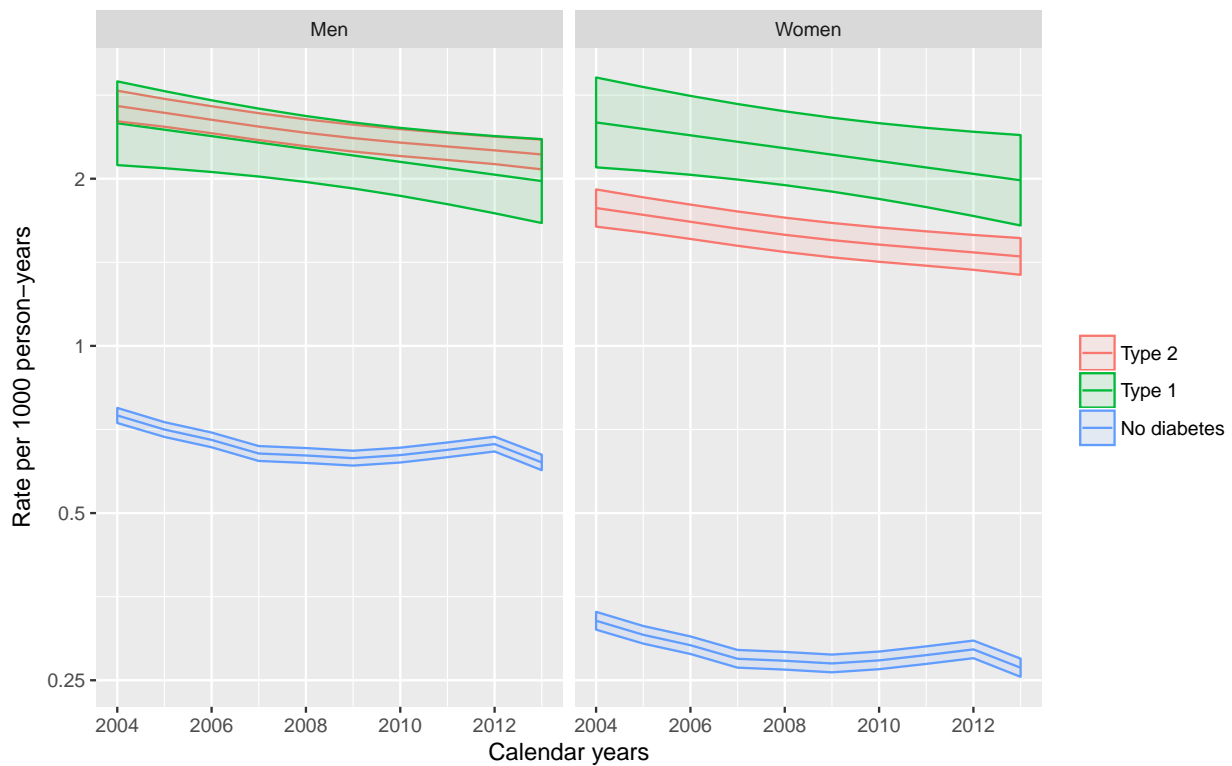

The lines represent the predicted rates obtained from generalized additive models of incident heart failure events on age, sex, deprivation, diabetes type and calendar year, with interaction terms included where these improved model fit, using a log-link and Poisson likelihood, with correction of the standard errors for overdispersion. Penalized thin plate regression splines were used to model non-linear associations for calendar year by diagnosis type. Predictions were made for men and women aged 50.

**Table S15 Time trends model, coefficients and standard errors with IHD admissions excluded**

|             | Estimate | Std. Error | t value  | Pr(> t ) |
|-------------|----------|------------|----------|----------|
| (Intercept) | -7.941   | 0.024      | -327.026 | <0.001   |

|                          | Estimate | Std. Error | t value | Pr(> t ) |
|--------------------------|----------|------------|---------|----------|
| age_ten                  | 1.082    | 0.009      | 125.008 | <0.001   |
| sex                      | -0.957   | 0.026      | -36.164 | <0.001   |
| dep_two                  | 0.621    | 0.017      | 36.892  | <0.001   |
| year                     | -0.006   | 0.003      | -2.127  | 0.033    |
| typet1dm                 | 1.343    | 0.144      | 9.36    | <0.001   |
| typet2dm                 | 1.486    | 0.062      | 23.988  | <0.001   |
| age_ten:sex              | 0.172    | 0.007      | 25.252  | <0.001   |
| age_ten:dep_two          | -0.158   | 0.006      | -26.502 | <0.001   |
| sex:dep_two              | 0.105    | 0.014      | 7.426   | <0.001   |
| age_ten:year             | -0.003   | 0.001      | -3.302  | 0.001    |
| age_ten:typet1dm         | -0.224   | 0.068      | -3.301  | 0.001    |
| age_ten:typet2dm         | -0.258   | 0.023      | -11.183 | <0.001   |
| sex:typet1dm             | 0.854    | 0.107      | 7.955   | <0.001   |
| sex:typet2dm             | 0.428    | 0.049      | 8.763   | <0.001   |
| dep_two:typet1dm         | -0.117   | 0.097      | -1.197  | 0.231    |
| dep_two:typet2dm         | -0.187   | 0.043      | -4.36   | <0.001   |
| year:typet1dm            | -0.015   | 0.013      | -1.15   | 0.25     |
| year:typet2dm            | -0.007   | 0.003      | -2.2    | 0.028    |
| age_ten:sex:typet1dm     | -0.222   | 0.051      | -4.335  | <0.001   |
| age_ten:sex:typet2dm     | -0.112   | 0.018      | -6.176  | <0.001   |
| age_ten:dep_two:typet1dm | 0.089    | 0.046      | 1.932   | 0.053    |
| age_ten:dep_two:typet2dm | 0.045    | 0.016      | 2.79    | 0.005    |

*Quasi-Poisson regression model with admissions or death as the outcome. Age\_ten is the age in years divided by ten and dep\_two is the deprivation score divided by two. The standard errors and P-values are scaled to allow for overdispersion.*

**Table S16 Estimates of non-parametric smooth functions with IHD admissions excluded**

|             | Estimated degrees of freedom | Chi-squared | Approximate P-value |
|-------------|------------------------------|-------------|---------------------|
| No diabetes | 7.646                        | 214.152     | <0.001              |
| Type 1      | 1.005                        | 4.75        | 0.03                |
| Type 2      | 1.968                        | 66.125      | <0.001              |

*Significance tests for the non-parametric smooth terms from a generalized additive model of incident heart failure events on age, sex, deprivation, diabetes type and calendar year, with interaction terms included where these improved model fit, using a log-link and Poisson likelihood, with correction of the standard errors for overdispersion. Penalized thin plate regression splines were used to model non-linear associations for calendar year by diagnosis type.*

## Sensitivity analysis - Events coded in First position only

Figure S8 Modelled rate of heart failure by diabetes type, age and sex with diagnosis recorded in first position only

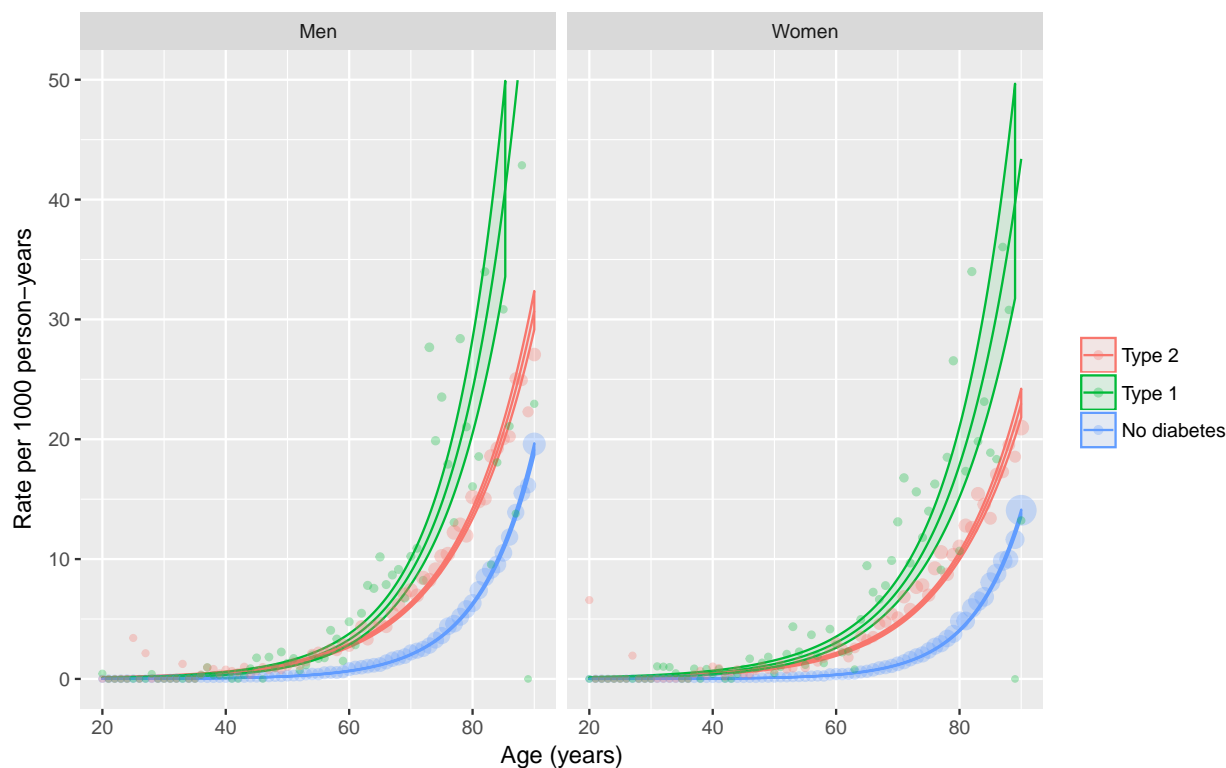

The lines represent the predicted rates obtained from quasi-Poisson regression models of incident heart failure events on age, sex, deprivation and diabetes type, with interaction terms included where these improved model fit. Predictions were made at the median deprivation score. Points represent event rates stratified by age (in years), sex and diabetes type.

Table S17 Cross-sectional model, coefficients and standard errors with diagnosis recorded in first position only

|                  | Estimate | Std. Error | t value  | Pr(> t ) |
|------------------|----------|------------|----------|----------|
| (Intercept)      | -9.264   | 0.039      | -236.959 | <0.001   |
| age_ten          | 1.319    | 0.013      | 100.519  | <0.001   |
| sex              | -0.864   | 0.038      | -22.468  | <0.001   |
| dep_two          | 0.828    | 0.026      | 31.31    | <0.001   |
| typet1dm         | 1.839    | 0.196      | 9.38     | <0.001   |
| typet2dm         | 2.031    | 0.082      | 24.651   | <0.001   |
| age_ten:sex      | 0.108    | 0.01       | 10.731   | <0.001   |
| age_ten:dep_two  | -0.199   | 0.009      | -22.317  | <0.001   |
| sex:dep_two      | 0.107    | 0.018      | 5.809    | <0.001   |
| age_ten:typet1dm | -0.173   | 0.083      | -2.078   | 0.038    |
| age_ten:typet2dm | -0.403   | 0.03       | -13.568  | <0.001   |
| sex:typet1dm     | 0.785    | 0.14       | 5.613    | <0.001   |
| sex:typet2dm     | 0.446    | 0.063      | 7.124    | <0.001   |

|                          | Estimate | Std. Error | t value | Pr(> t ) |
|--------------------------|----------|------------|---------|----------|
| dep_two:typet1dm         | -0.119   | 0.13       | -0.916  | 0.359    |
| dep_two:typet2dm         | -0.28    | 0.056      | -4.996  | <0.001   |
| age_ten:sex:typet1dm     | -0.217   | 0.061      | -3.537  | <0.001   |
| age_ten:sex:typet2dm     | -0.102   | 0.023      | -4.51   | <0.001   |
| age_ten:dep_two:typet1dm | 0.05     | 0.056      | 0.902   | 0.367    |
| age_ten:dep_two:typet2dm | 0.083    | 0.02       | 4.095   | <0.001   |

*Quasi-Poisson regression model with admissions or death as the outcome. Age\_ten is the age in years divided by ten and dep\_two is the deprivation score divided by two. The standard errors and P-values are scaled to allow for overdispersion.*

**Figure S9 Trends in rates of heart failure by diabetes type, sex and calendar year with with diagnosis recored in first position only**

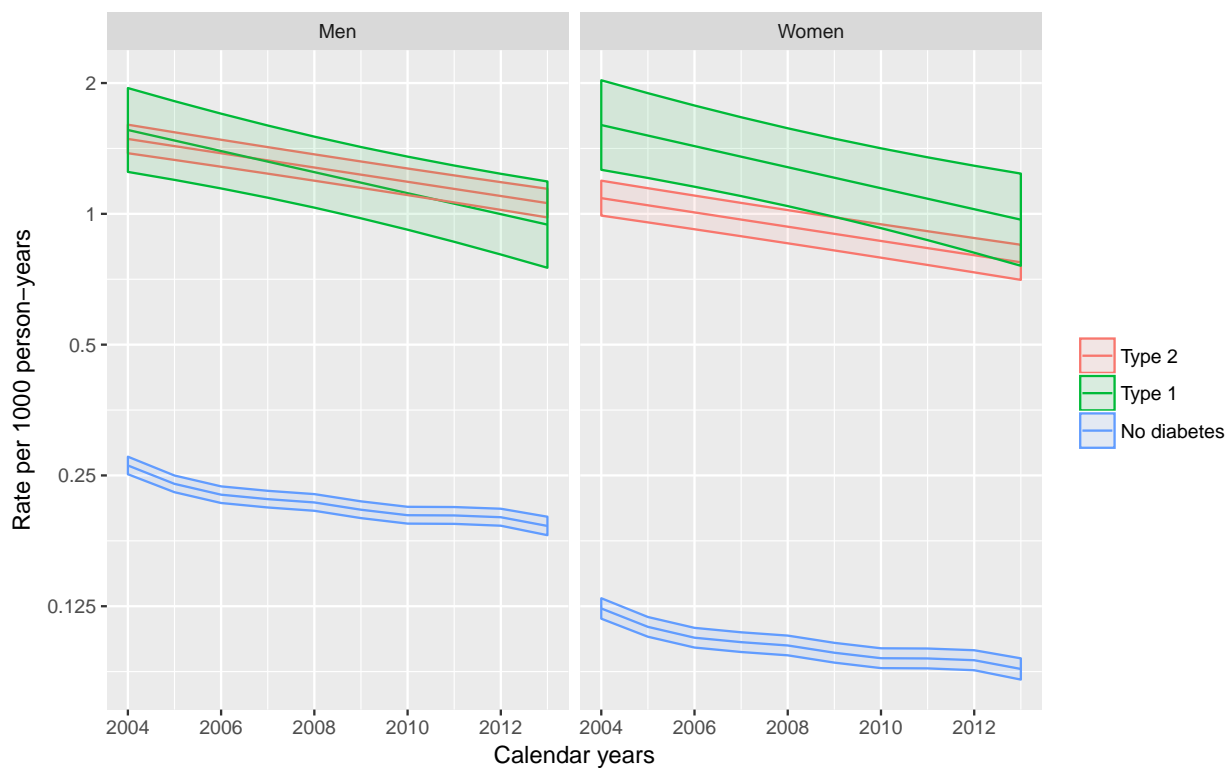

*The lines represent the predicted rates obtained from generalized additive models of incident heart failure events on age, sex, deprivation, diabetes type and calendar year, with interaction terms included where these improved model fit, using a log-link and Poisson likelihood, with correction of the standard errors for overdispersion. Penalized thin plate regression splines were used to model non-linear associations for calendar year by diagnosis type. Predictions were made for men and women aged 50.*

**Table S18 Time trends model, coefficients and standard errors with diagnosis recored in first position only**

|                          | Estimate | Std. Error | t value  | Pr(> t ) |
|--------------------------|----------|------------|----------|----------|
| (Intercept)              | -9.25    | 0.039      | -237.045 | <0.001   |
| age_ten                  | 1.322    | 0.013      | 100.86   | <0.001   |
| sex                      | -0.865   | 0.038      | -22.57   | <0.001   |
| dep_two                  | 0.826    | 0.026      | 31.325   | <0.001   |
| year                     | -0.03    | 0.004      | -6.762   | <0.001   |
| typet1dm                 | 1.863    | 0.195      | 9.548    | <0.001   |
| typet2dm                 | 2.04     | 0.082      | 24.809   | <0.001   |
| age_ten:sex              | 0.107    | 0.01       | 10.652   | <0.001   |
| age_ten:dep_two          | -0.2     | 0.009      | -22.51   | <0.001   |
| sex:dep_two              | 0.108    | 0.018      | 5.877    | <0.001   |
| age_ten:year             | 0        | 0.002      | -0.052   | 0.958    |
| age_ten:typet1dm         | -0.178   | 0.083      | -2.152   | 0.031    |
| age_ten:typet2dm         | -0.401   | 0.03       | -13.517  | <0.001   |
| sex:typet1dm             | 0.784    | 0.139      | 5.629    | <0.001   |
| sex:typet2dm             | 0.444    | 0.063      | 7.102    | <0.001   |
| dep_two:typet1dm         | -0.125   | 0.129      | -0.971   | 0.331    |
| dep_two:typet2dm         | -0.279   | 0.056      | -4.974   | <0.001   |
| year:typet1dm            | -0.025   | 0.015      | -1.683   | 0.092    |
| year:typet2dm            | -0.007   | 0.004      | -1.781   | 0.075    |
| age_ten:sex:typet1dm     | -0.219   | 0.061      | -3.588   | <0.001   |
| age_ten:sex:typet2dm     | -0.102   | 0.023      | -4.512   | <0.001   |
| age_ten:dep_two:typet1dm | 0.05     | 0.055      | 0.906    | 0.365    |
| age_ten:dep_two:typet2dm | 0.084    | 0.02       | 4.135    | <0.001   |

*Quasi-Poisson regression model with admissions or death as the outcome. Age\_ten is the age in years divided by ten and dep\_two is the deprivation score divided by two. The standard errors and P-values are scaled to allow for overdispersion.*

**Table S19 Estimates of non-parametric smooth functions with with diagnosis recorded in first position only**

|             | Estimated degrees of freedom | Chi-squared | Approximate P-value |
|-------------|------------------------------|-------------|---------------------|
| No diabetes | 5.772                        | 294.872     | <0.001              |
| Type 1      | 1.01                         | 15.662      | <0.001              |
| Type 2      | 1.018                        | 127.99      | <0.001              |

*Significance tests for the non-parametric smooth terms from a generalized additive model of incident heart failure events on age, sex, deprivation, diabetes type and calendar year, with interaction terms included where these improved model fit, using a log-link and Poisson likelihood, with correction of the standard errors for overdispersion. Penalized thin plate regression splines were used to model non-linear associations for calendar year by diagnosis type.*

### Legend for interactive figure

The interactive figure is available at [https://ihwph-hehta.shinyapps.io/dm\\_hf\\_fig2/](https://ihwph-hehta.shinyapps.io/dm_hf_fig2/).

This figure is an interactive version of Figure 2 which can be found in the main manuscript. The lines represent the predicted rates obtained from generalized additive models of incident heart failure events. The

ribbons are 95% confidence intervals. Covariates included in the model were age, sex, deprivation, diabetes type and calendar-year, with interaction terms included where these improved model fit. The model was fit with a log-link and Poisson likelihood, with correction of the standard errors for overdispersion. Penalized thin plate regression splines were used to model non-linear associations for calendar-year by diagnosis type.

## References

1. Stef van Buuren, Karin Groothuis-Oudshoorn. MICE: Multivariate Imputation by Chained Equations in R. *Journal of Statistical Software*. 2011;45:1-67. DOI: 10.18637/jss.v045.i03.
2. Barnard, J. and Rubin, D.B. Small sample degrees of freedom with multiple imputation. *Biometrika*. 1999;86:948-955.
